# Supplementary material
Source: PubMed Central journal article supplement (PMC1904145)

**CD63**

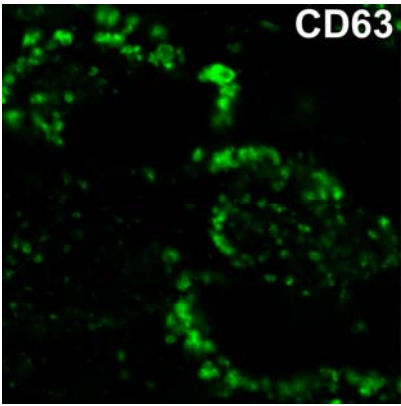

**A2E**

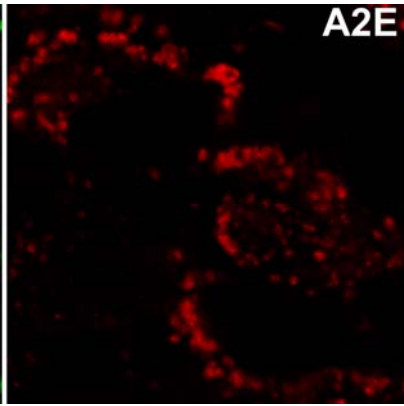

**Merge**

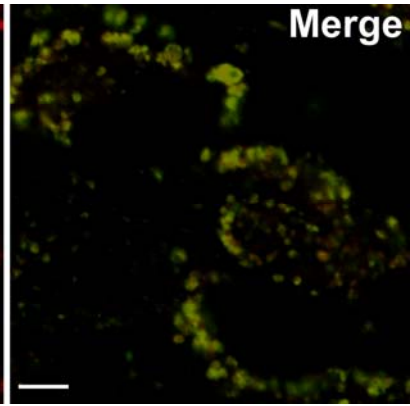

Supplement: pnas_0702504104_1.pdf [file pnas_0702504104_1.pdf]

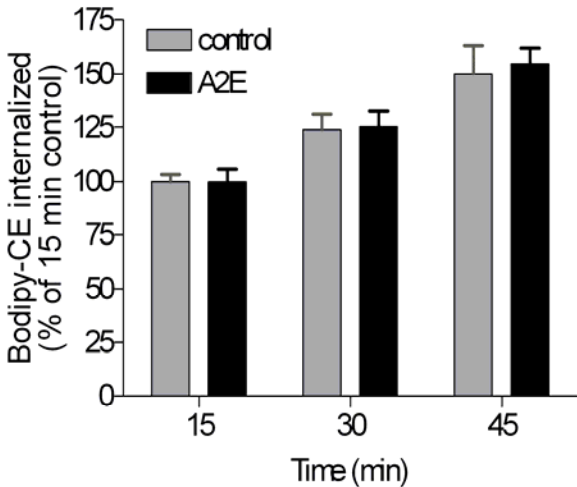

Supplement: pnas_0702504104_2.pdf [file pnas_0702504104_2.pdf]

**Bodipy-CE**

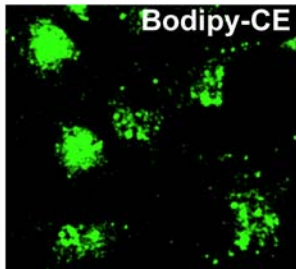

**A2E**

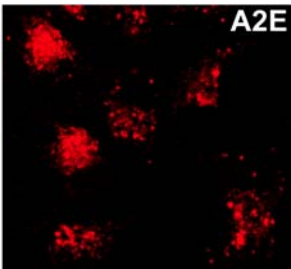

**Merge**

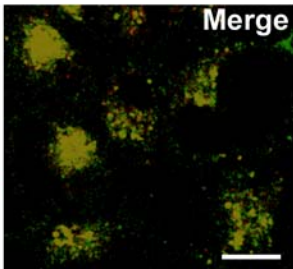

**Bodipy-CE**

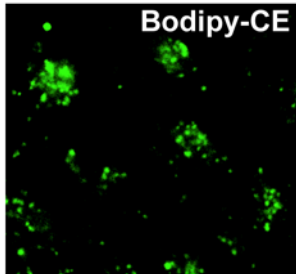

**LysoBlue**

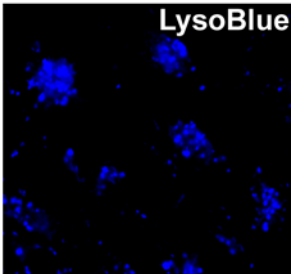

**Merge**

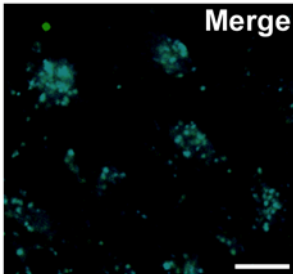

Supplement: pnas_0702504104_3.pdf [file pnas_0702504104_3.pdf]
